# Supplementary material for: Highly ordered π-extended discotic liquid-crystalline triindoles
Source: Royal Society of Chemistry journal article supplement (doi:10.1039/c0jm04395h), 2011-01-01
Supplement: c0jm04395h.pdf [file c0jm04395h.pdf]

## Highly ordered $\pi$ -extended discotic liquid-crystalline triindoles

Eva M. García-Frutos, Ana Omenat, Joaquín Barberá, José Luis Serrano and Berta Gómez-Lor\*

### Supporting Information

|                                                                                                                       | <b>Page</b> |
|-----------------------------------------------------------------------------------------------------------------------|-------------|
| <b>1. Cyclic Voltammetry Measurements</b>                                                                             | <b>S1</b>   |
| <b>2. UV-Vis absorption Measurements</b>                                                                              | <b>S6</b>   |
| <b>3. UV-Vis emission Measurements</b>                                                                                | <b>S7</b>   |
| <b>4. <math>^1\text{H}</math> NMR Experiments of <b>8</b> in <math>\text{CDCl}_3</math> at variable concentration</b> | <b>S9</b>   |

## 1. Cyclic Voltammetry Measurements

Cyclic voltammetric (CV) experiments were performed on an Epsilon Electrochemical Analyzer in a three electrode cell (Pt working electrode) at room temperature, under nitrogen atmosphere. Electrochemical measurements were performed in a millimolar CH<sub>2</sub>Cl<sub>2</sub> solution of compounds Series I and Series II containing 0.1 M of recrystallized supporting electrolyte tetra-*n*-butylammonium hexafluorophosphate (TBAPF<sub>6</sub>). Potentials were measured against Ag/AgCl as reference electrode. A large area coiled Pt wire was used as a counter electrode.

**Table S1** . Cyclic Voltammetry data for Series I and Series II

| Compounds | Series I                              |                                        | Compounds | Series II                             |                                        |                                       |                                        |
|-----------|---------------------------------------|----------------------------------------|-----------|---------------------------------------|----------------------------------------|---------------------------------------|----------------------------------------|
|           | First Oxidation wave E <sub>1/2</sub> | Second Oxidation wave E <sub>1/2</sub> |           | First Oxidation wave E <sub>1/2</sub> | Second Oxidation wave E <sub>1/2</sub> | Third Oxidation wave E <sub>1/2</sub> | Fourth Oxidation wave E <sub>1/2</sub> |
| <b>1</b>  | 0.77                                  | 1.33                                   | <b>8</b>  | 0.67                                  | 0.83                                   | 1.11                                  | 1.35                                   |
| <b>2</b>  | 0.72                                  | 1.28                                   | <b>9</b>  | 0.53                                  | 0.80                                   | 1.03                                  | 1.27                                   |
| <b>3</b>  | 0.71                                  | 1.20                                   | <b>10</b> | 0.47                                  | 0.69                                   | 0.89                                  | 1.10                                   |
| <b>5</b>  | 0.70                                  | 1.21                                   | <b>11</b> | 0.49                                  | 0.72                                   | 1.11                                  |                                        |

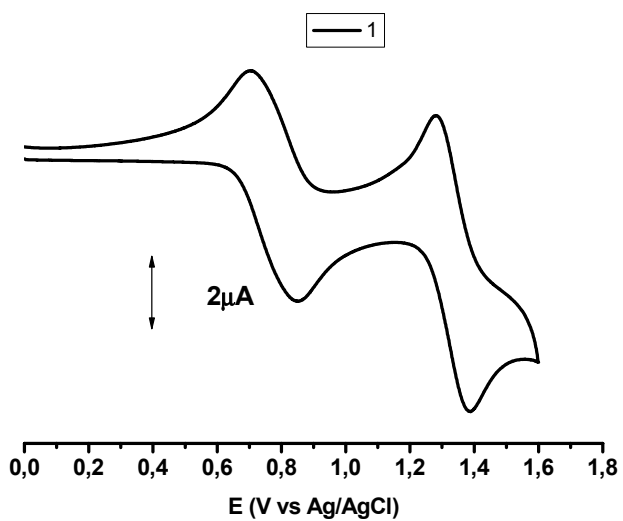

**Figure S1.** Cyclic voltammogram of 1.

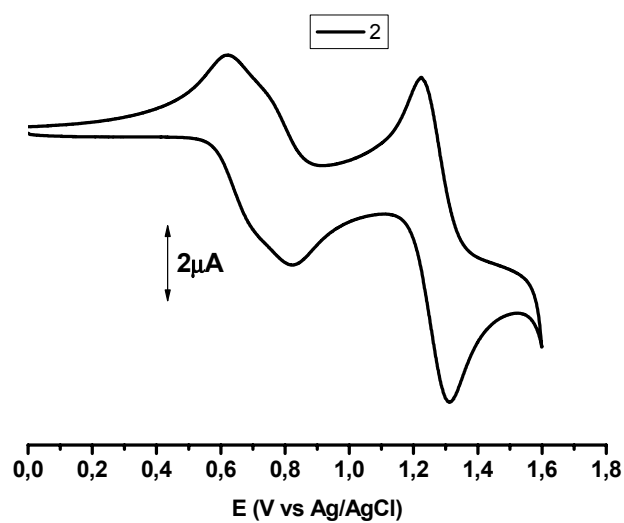

**Figure S2.** Cyclic voltammogram of 2.

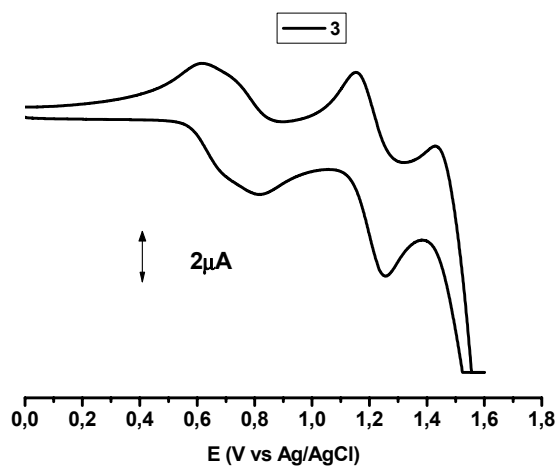

**Figure S3.** Cyclic voltammogram of 3.

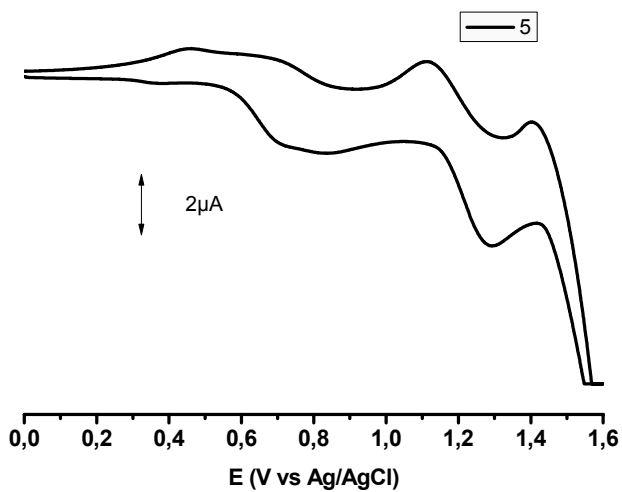

**Figure S4.** Cyclic voltammogram of 5.

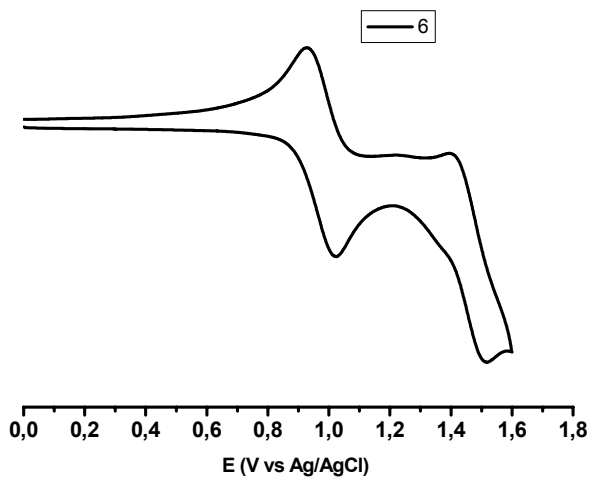

**Figure S5.** Cyclic voltammogram of **6**.

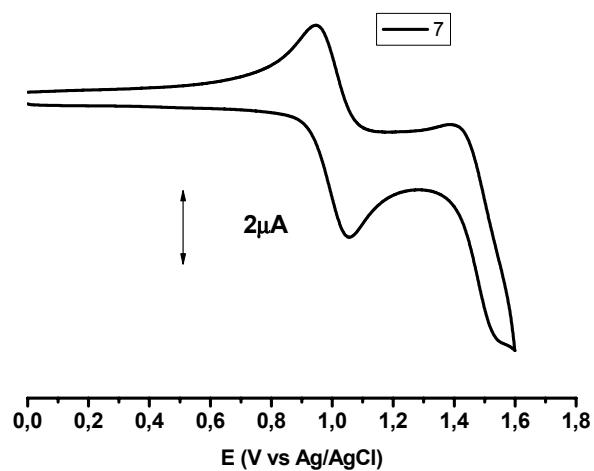

**Figure S6.** Cyclic voltammogram of **7**.

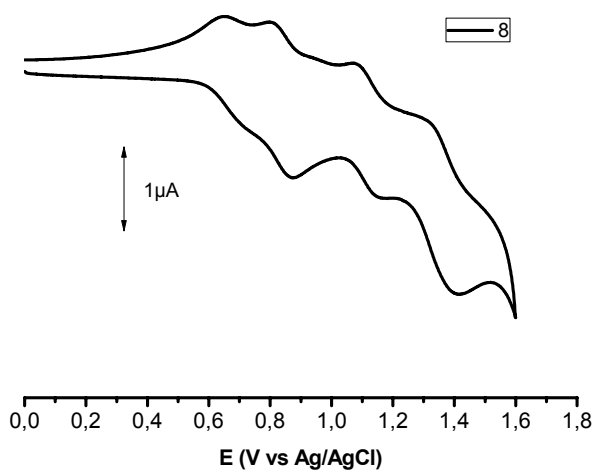

**Figure S7.** Cyclic voltammogram of **8**.

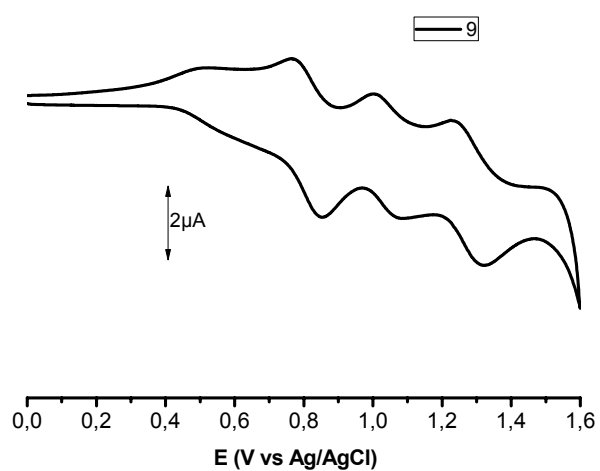

**Figure S8.** Cyclic voltammogram of **9**.

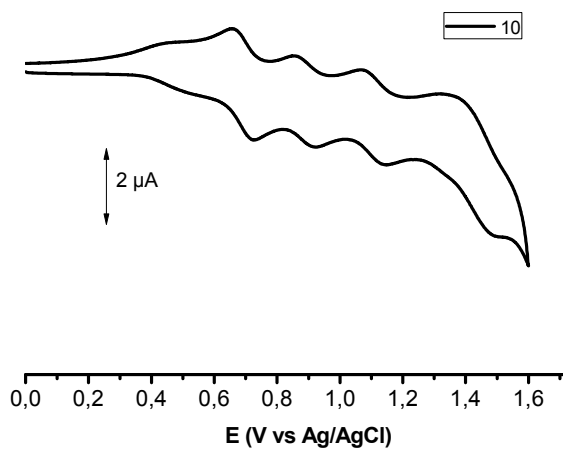

**Figure S9.** Cyclic voltammogram of 10.

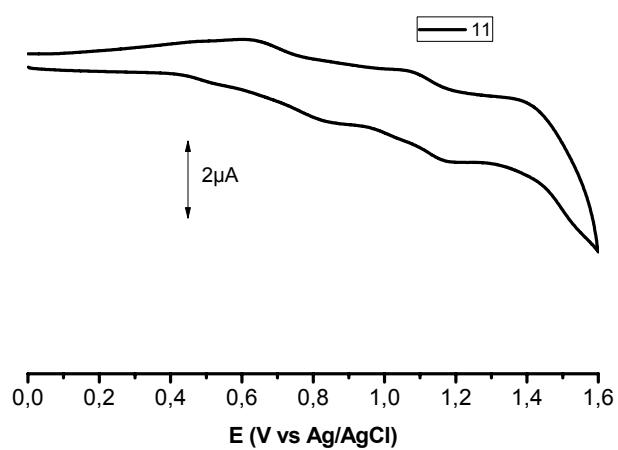

**Figure S10.** Cyclic voltammogram of 11.

## 2. UV-Vis absorption Measurements

Steady-state absorption was carried out on a spectrophotometer UV-2401PC, Shimadzu

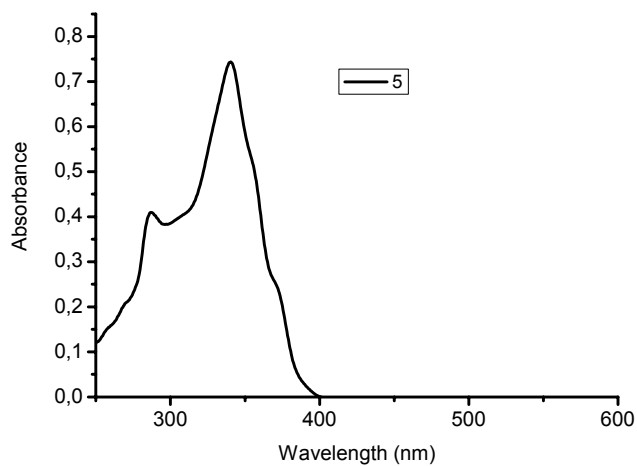

Figure S11. UV-visible of **5** in CH<sub>2</sub>Cl<sub>2</sub>

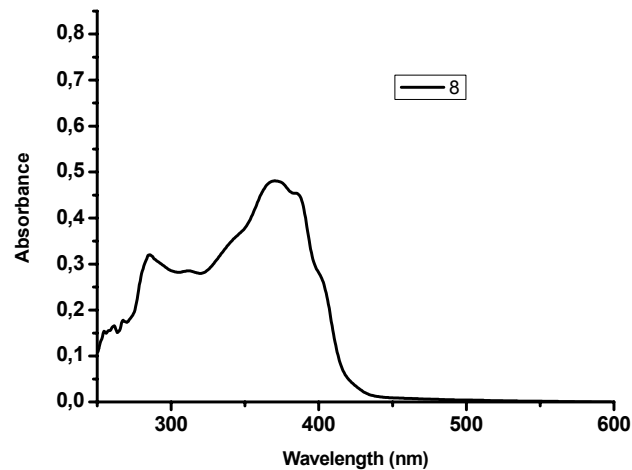

Figure S12. UV-visible of **8** in CH<sub>2</sub>Cl<sub>2</sub>

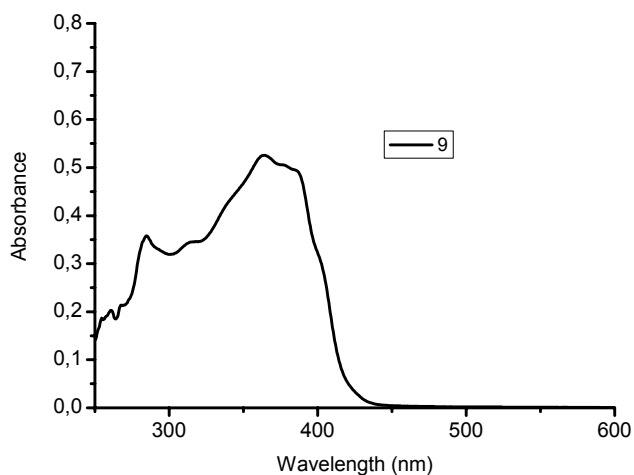

Figure S13. UV-visible of **9** in CH<sub>2</sub>Cl<sub>2</sub>

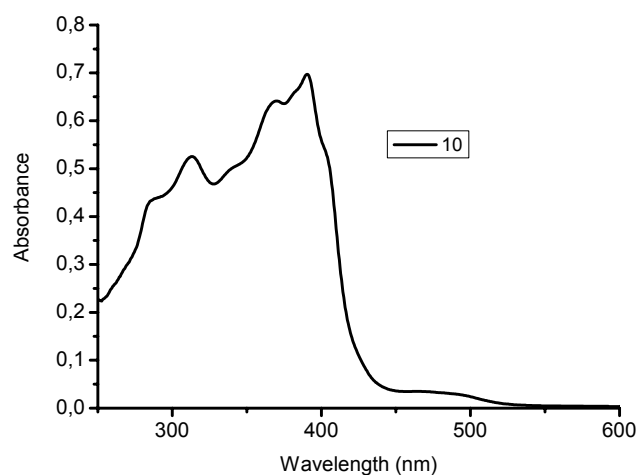

Figure S14. UV-visible of **10** in CH<sub>2</sub>Cl<sub>2</sub>

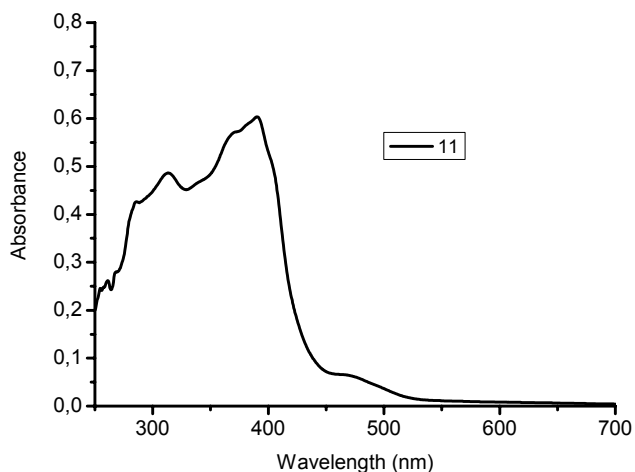

**Figure S15.** UV-visible of **11** in CH<sub>2</sub>Cl<sub>2</sub>

### 3. UV-Vis emission Measurements

Steady-state absorption was carried out on a spectrophotometer, Perkin-Elmer LS50B. Fluorescence spectra of Series I and II in CH<sub>2</sub>Cl<sub>2</sub> and in mesophases.

#### 3.1 Fluorescence Spectra of Series I

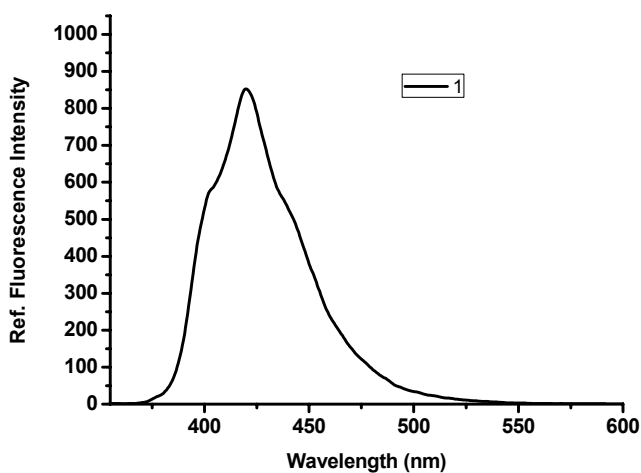

**Figure S16.** Normalized emission of **1**

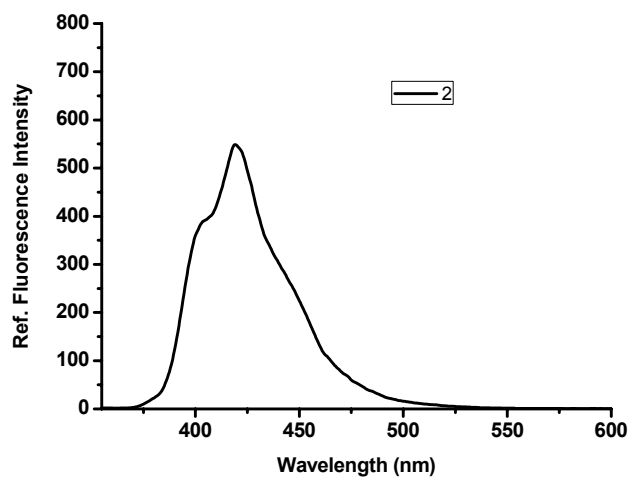

**Figure S17.** Normalized emission of **2**

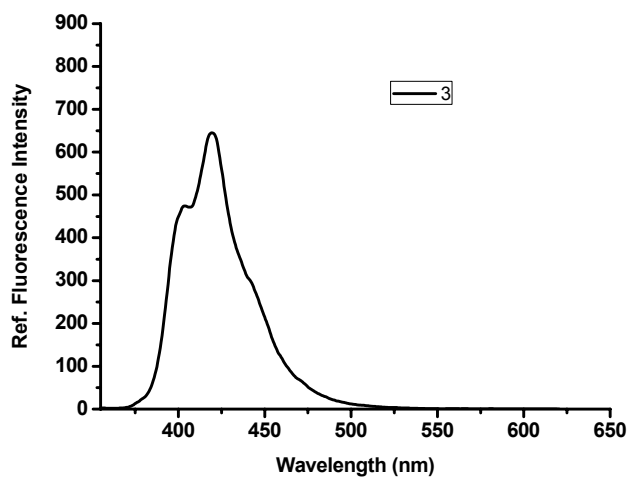

Figure S18. Normalized emission of 3

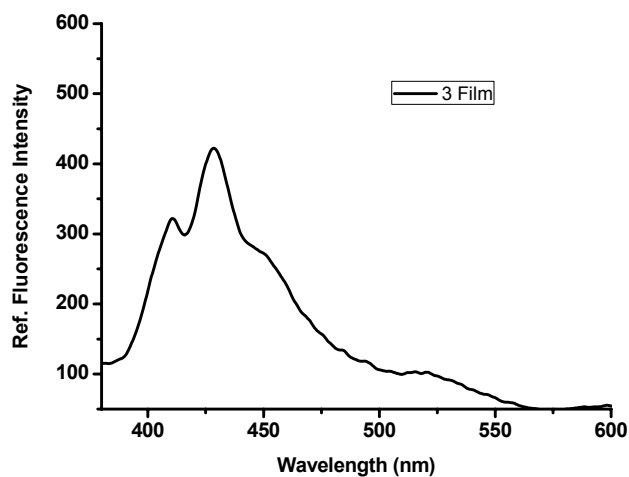

Figure S19. Normalized emission of 3 Film

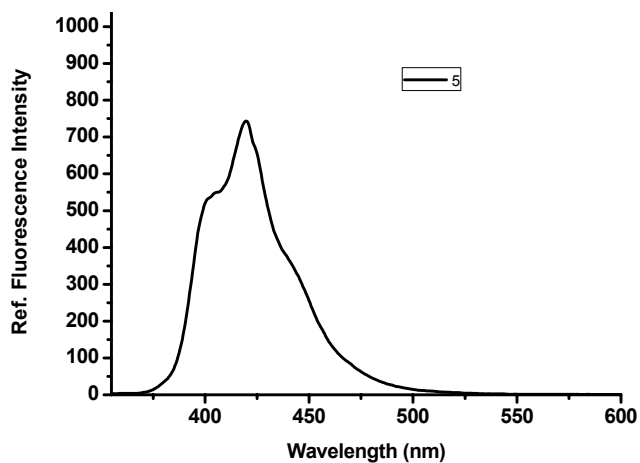

Figure S20. Normalized emission of 5

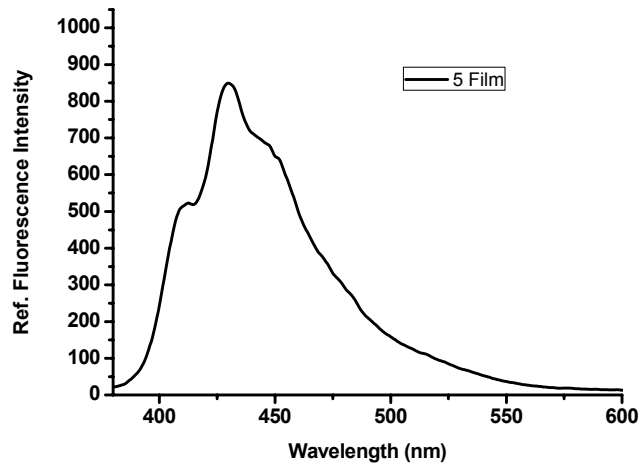

Figure S21. Normalized emission of 5 Film

### 3.2 Fluorescence Spectra of Series II

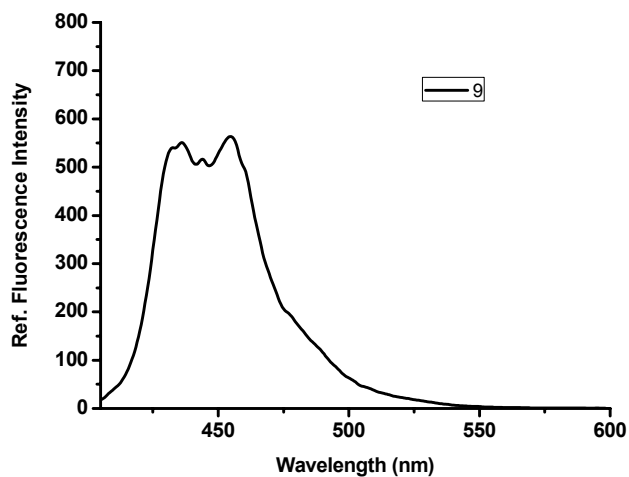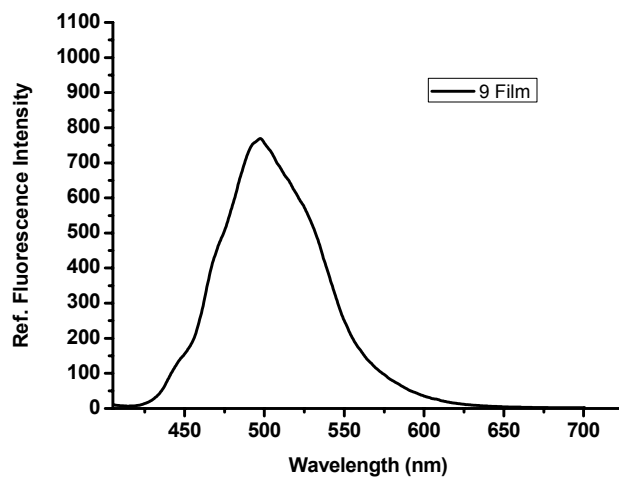



**Figure S22.** Normalized emission of **9**

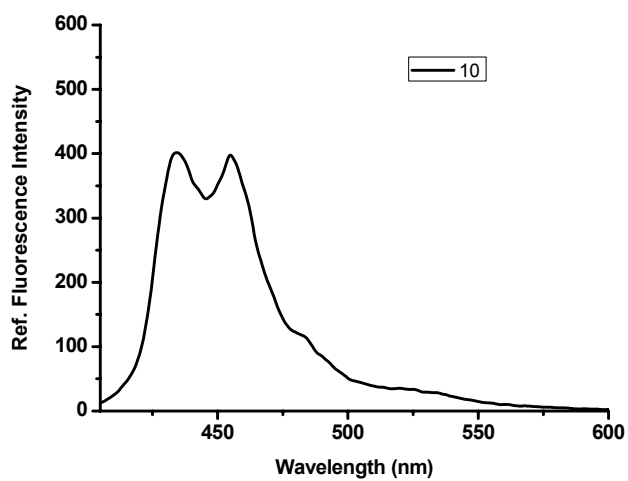

**Figure S23.** Normalized emission of **9 Film**

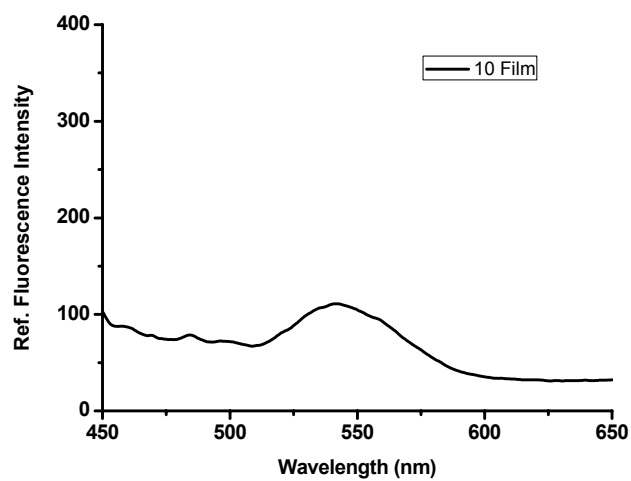

**Figure S24.** Normalized emission of **10**

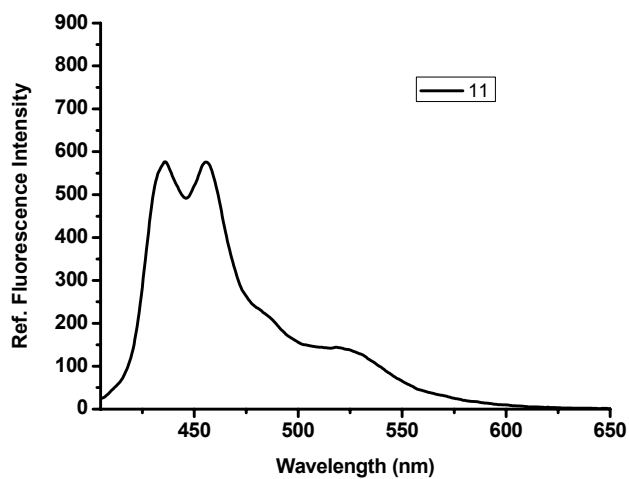

**Figure S25.** Normalized emission of **10 Film**

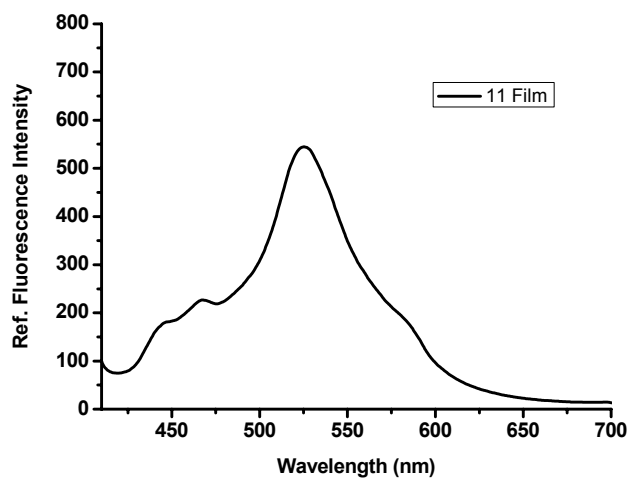

**Figure S26.** Normalized emission of **11**

**Figure S27.** Normalized emission of **11 Film**

#### 4. $^1\text{H}$ NMR Experiments of **8** in $\text{CDCl}_3$ at variable concentration

$^1\text{H}$  NMR experiments spectra were conducted on a Bruker AC-200 spectrometer operating at 200MHz

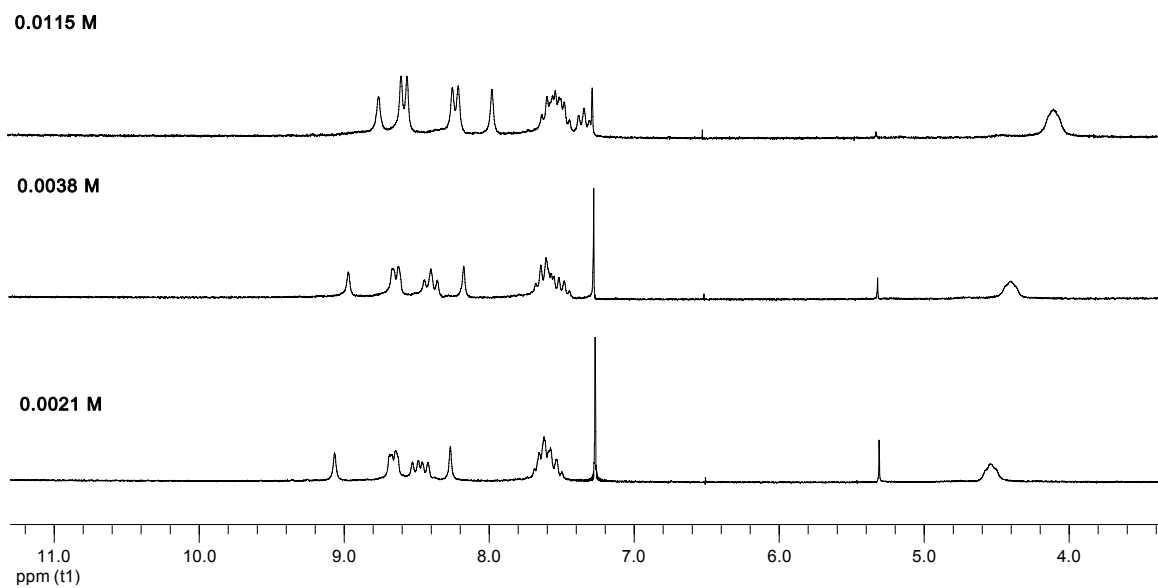

**Figure S28.** Concentration-dependent  $^1\text{H}$  NMR spectra of **8** in  $\text{CDCl}_3$ .

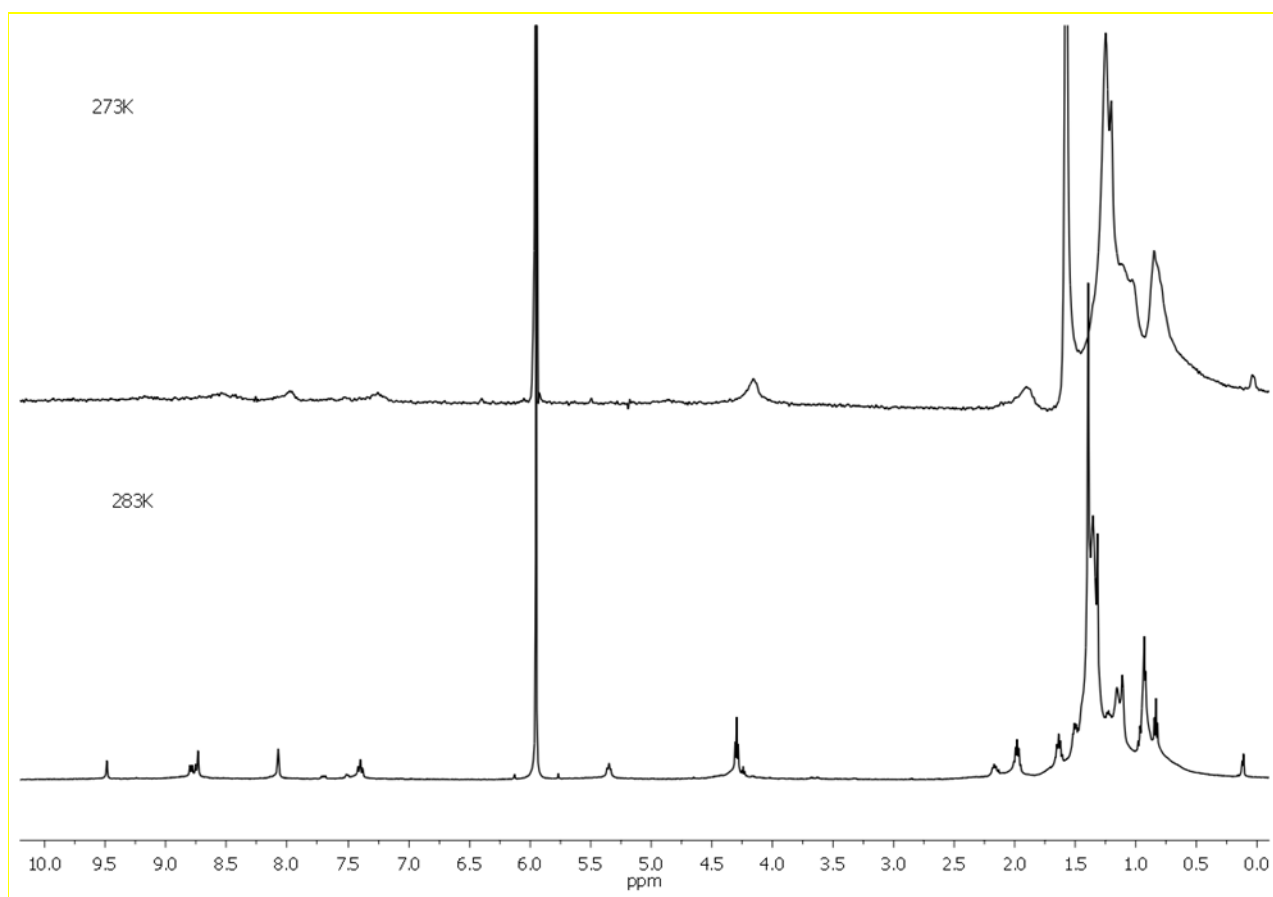

**Figure S29.** Temperature-dependent <sup>1</sup>H NMR spectra of **11** in  $C_2D_2Cl_4$ .
